# Supplementary material
Source: HighWire-hosted journal article supplement (https://jnm.snmjournals.org/highwire/filestream/94952/field_highwire_adjunct_files/2/171868_Supplemental_Data.pdf)
Supplement: 171868_Supplemental_Data.pdf [file 171868_Supplemental_Data.pdf]

**SUPPLEMENTAL Video 1:** An example of brain-computer interface (BCI)-guided rat navigation. The rat was instructed to climb up a slope, cross a bridge, and make left or right turns according to the directions (white arrows).

**SUPPLEMENTAL Video 2:** Representative video of orienting performance induced by the VPM thalamus electrical stimulation in the animal.
